# Supplementary material
Source: PubMed Central journal article supplement (PMC3078377)
Supplement: 1019383108_pnas.201019383SI.pdf [file 1019383108_pnas.201019383SI.pdf]

# Supporting Information

Lemke et al. 10.1073/pnas.1019383108

Table S1. Operon structure

| Promoter                      | Operon structure                                                   | No. of r-protein genes | Total no. of genes |
|-------------------------------|--------------------------------------------------------------------|------------------------|--------------------|
| <i>rpsJ</i> (S10)             | <i>rpsJ-rplC-rplD-rplW-rplB-rpsS-rplV-rpsC-rplP-rpmC-rpsQ</i>      | 11                     | 11                 |
| <i>rplK</i> (L11-L1)          | <i>rplK-rplA</i>                                                   | 2                      | 2                  |
| <i>rplN</i> (spc)             | <i>rplN-rplX-rplE-rpsN-rpsH-rplF-rplR-rpsE-rpmD-rplO-secY-rpmJ</i> | 11                     | 12                 |
| <i>rpsM</i> ( $\alpha$ )      | <i>rpsM-rpsK-rpsD-rpoA-rplQ</i>                                    | 4                      | 5                  |
| <i>rpsL</i> (str)             | <i>rpsL-rpsG-fusA-tufA</i>                                         | 2                      | 4                  |
| <i>rpsA</i> P1 (S1)           | <i>rpsA-ihfB</i>                                                   | 1                      | 2                  |
| <i>rpsA</i> P3 (S1)           |                                                                    |                        |                    |
| <i>rpsP</i> (S16)             | <i>rpsP-rimM-trmD-rplS</i>                                         | 2                      | 4                  |
| <i>rpsT</i> P1 (S20)          | <i>rpsT</i>                                                        | 1                      | 1                  |
| <i>rpsT</i> P2 (S20)          |                                                                    |                        |                    |
| <i>thrS</i>                   | <i>thrS-infC-rpmI-rplT</i>                                         | 2                      | 4                  |
| <i>infC</i> P1                |                                                                    |                        |                    |
| <i>infC</i> P2                |                                                                    |                        |                    |
| <i>rpmI</i>                   |                                                                    |                        |                    |
| <i>rpoZ</i> ( $\omega$ )      | <i>rpoZ-spoT-trmH-recG</i>                                         | 0                      | 4                  |
| <i>rplJ</i> ( $\beta\beta'$ ) | <i>rplJ-rplL-rpoB-rpoC</i>                                         | 2                      | 4                  |
| <i>rpsU</i> P2 (S21)          | <i>rpsU-dnaG-rpoD</i>                                              | 1                      | 3                  |
| <i>rrnB</i> P1                | <i>rrsB-gltT-rrlB-rrfB</i>                                         | 0                      | 4                  |

r-Protein operon structure. The genes proposed to be cotranscribed from the promoters in this study are listed in order. In the case of the *thrS-infC-rpmI-rplT* operon, several of the promoters are internal to this operon and are not responsible for transcribing it in its entirety.

**Table S2. Strains and plasmids used in this work**

| Strain   | Relevant genotype                                                          | Promoter- <i>lacZ</i> fusion  | Promoter endpoints | Source (Ref.) |
|----------|----------------------------------------------------------------------------|-------------------------------|--------------------|---------------|
| VH1000   | RLG3499 = MG1655 <i>pyrE<sup>+</sup> lacZ<sup>-</sup> lacI<sup>-</sup></i> |                               |                    | (1)           |
| RLG4996  | VH1000                                                                     | <i>rrnB</i> P1                | -46/+1             | (2)           |
| RLG6348  | VH1000 <i>dksA::tet</i>                                                    | <i>rrnB</i> P1                | -46/+1             | (2)           |
| RLG4998  | VH1000                                                                     | <i>lacUV5</i>                 | -59/+36            | (3)           |
| RLG8950  | VH1000 <i>dksA::tet</i>                                                    | <i>lacUV5</i>                 | -59/+36            | (4)           |
| RLG8980  | VH1000                                                                     | <i>rpsJ</i> (S10)*            | -486/+14           | This work     |
| RLG8981  | VH1000 <i>dksA::tet</i>                                                    | <i>rpsJ</i> (S10)*            | -486/+14           | This work     |
| RLG9456  | VH1000                                                                     | <i>rplK</i> (L11-L1)          | -100/+9            | This work     |
| RLG9468  | VH1000 <i>dksA::tet</i>                                                    | <i>rplK</i> (L11-L1)          | -100/+9            | This work     |
| RLG9458  | VH1000                                                                     | <i>rplN</i> (spc)             | -100/+9            | This work     |
| RLG9470  | VH1000 <i>dksA::tet</i>                                                    | <i>rplN</i> (spc)             | -100/+9            | This work     |
| RLG9242  | VH1000                                                                     | <i>rpsM</i> ( $\alpha$ )      | -100/+9            | This work     |
| RLG9243  | VH1000 <i>dksA::tet</i>                                                    | <i>rpsM</i> ( $\alpha$ )      | -100/+9            | This work     |
| RLG9457  | VH1000                                                                     | <i>rpsL</i> (str)             | -100/+9            | This work     |
| RLG9469  | VH1000 <i>dksA::tet</i>                                                    | <i>rpsL</i> (str)             | -100/+9            | This work     |
| RLG9461  | VH1000                                                                     | <i>rpsA</i> P1 (S1)           | -90/+20            | This work     |
| RLG9474  | VH1000 <i>dksA::tet</i>                                                    | <i>rpsA</i> P1 (S1)           | -90/+20            | This work     |
| RLG9454  | VH1000                                                                     | <i>rpsA</i> P3 (S1)           | -100/+20           | This work     |
| RLG9466  | VH1000 <i>dksA::tet</i>                                                    | <i>rpsA</i> P3 (S1)           | -100/+20           | This work     |
| RLG9240  | VH1000                                                                     | <i>rpsP</i> (S16)             | -100/+12           | This work     |
| RLG9241  | VH1000 <i>dksA::tet</i>                                                    | <i>rpsP</i> (S16)             | -100/+12           | This work     |
| RLG9460  | VH1000                                                                     | <i>rpsT</i> P1 (S20)          | -100/+20           | This work     |
| RLG9473  | VH1000 <i>dksA::tet</i>                                                    | <i>rpsT</i> P1 (S20)          | -100/+20           | This work     |
| RLG9459  | VH1000                                                                     | <i>rpsT</i> P2 (S20)          | -89/+20            | This work     |
| RLG9471  | VH1000 <i>dksA::tet</i>                                                    | <i>rpsT</i> P2 (S20)          | -89/+20            | This work     |
| RLG9462  | VH1000                                                                     | <i>thrS</i>                   | -100/+9            | This work     |
| RLG9475  | VH1000 <i>dksA::tet</i>                                                    | <i>thrS</i>                   | -100/+9            | This work     |
| RLG9463  | VH1000                                                                     | <i>infC</i> P1                | -100/+9            | This work     |
| RLG9476  | VH1000 <i>dksA::tet</i>                                                    | <i>infC</i> P1                | -100/+9            | This work     |
| RLG9464  | VH1000                                                                     | <i>infC</i> P2                | -100/+9            | This work     |
| RLG9477  | VH1000 <i>dksA::tet</i>                                                    | <i>infC</i> P2                | -100/+9            | This work     |
| RLG9455  | VH1000                                                                     | <i>rpmI</i> (L35)             | -100/+9            | This work     |
| RLG9467  | VH1000 <i>dksA::tet</i>                                                    | <i>rpmI</i> (L35)             | -100/+9            | This work     |
| RLG9491  | VH1000                                                                     | <i>rpoZ</i> ( $\omega$ )      | -100/+20           | This work     |
| RLG9472  | VH1000 <i>dksA::tet</i>                                                    | <i>rpoZ</i> ( $\omega$ )      | -100/+20           | This work     |
| RLG9492  | VH1000                                                                     | <i>rplJ</i> ( $\beta\beta'$ ) | -100/+5            | This work     |
| RLG9496  | VH1000 <i>dksA::tet</i>                                                    | <i>rplJ</i> ( $\beta\beta'$ ) | -100/+5            | This work     |
| RLG9495  | VH1000                                                                     | <i>rpsU</i> P2 (S21)          | -70/+20            | This work     |
| RLG9499  | VH1000 <i>dksA::tet</i>                                                    | <i>rpsU</i> P2 (S21)          | -70/+20            | This work     |
| Plasmid  | Description                                                                |                               | Promoter endpoints | Source        |
| pRLG770  | Transcription vector                                                       |                               |                    | (5)           |
| pRLG8447 | pRLG770 containing <i>rpsJ</i> (S10) promoter                              |                               | -100/+50           | This work     |
| pRLG9223 | pRLG770 containing <i>rplK</i> (L11-L1) promoter                           |                               | -100/+45           | This work     |
| pRLG9225 | pRLG770 containing <i>rplN</i> (spc) promoter                              |                               | -100/+50           | This work     |
| pRLG9222 | pRLG770 containing <i>rpsM</i> ( $\alpha$ ) promoter                       |                               | -100/+50           | This work     |
| pRLG9224 | pRLG770 containing <i>rpsL</i> (str) promoter                              |                               | -100/+50           | This work     |
| pRLG9233 | pRLG770 containing <i>rpsA</i> P1 (S1) promoter                            |                               | -90/+50            | This work     |
| pRLG9235 | pRLG770 containing <i>rpsA</i> P3 (S1) promoter                            |                               | -100/+50           | This work     |
| pRLG9234 | pRLG770 containing <i>rpsP</i> (S16) promoter                              |                               | -100/+3            | This work     |
| pRLG9236 | pRLG770 containing <i>rpsT</i> P1 (S20) promoter                           |                               | -100/+50           | This work     |
| pRLG9237 | pRLG770 containing <i>rpsT</i> P2 (S20) promoter                           |                               | -89/+50            | This work     |
| pRLG9249 | pRLG770 containing <i>thrS</i> promoter                                    |                               | -100/+50           | This work     |
| pRLG9450 | pRLG770 containing <i>infC</i> P1 promoter                                 |                               | -100/+50           | This work     |
| pRLG9451 | pRLG770 containing <i>infC</i> P2 promoter                                 |                               | -100/+50           | This work     |
| pRLG9452 | pRLG770 containing <i>rpmI</i> (L35) promoter                              |                               | -100/+50           | This work     |
| pRLG9480 | pRLG770 containing <i>rpoZ</i> ( $\omega$ ) promoter                       |                               | -100/+50           | This work     |
| pRLG9481 | pRLG770 containing <i>rplJ</i> ( $\beta\beta'$ ) promoter                  |                               | -100/+5            | This work     |
| pRLG9485 | pRLG770 containing <i>rpsU</i> P2 promoter                                 |                               | -70/+50            | This work     |
| pMSB1    | Cloning vector for lambda recombination                                    |                               |                    | (6)           |

Strains and plasmids used in this study. The asterisks indicate promoter-*lacZ* fusions that were created by ligation of promoter and lambda arm DNA fragments followed by packaging in vitro rather than by recombination and infection in vivo (*Materials and Methods*). Promoter endpoints are numbered relative to the +1 transcription start site (known or predicted).
